# Supplementary material
Source: PubMed Central journal article supplement (PMC2703538)
Supplement: en.2008-1741_2.pdf [file en.2008-1741_2.pdf]

**Supplemental Table 1. Sources and specifications of the primary antibodies<sup>a</sup> used in different experiments.**

| <b>Vendor</b>                                | <b>Antibody</b>                                 | <b>Catalog no.</b> | <b>Lot no.</b> | <b>Working<sup>b</sup> dilution or amount</b>  |
|----------------------------------------------|-------------------------------------------------|--------------------|----------------|------------------------------------------------|
| Santa Cruz Biotechnology<br>(Santa Cruz, CA) | Mouse monoclonal anti-c-Src                     | sc-8056            | K0507          | IB, 1:300                                      |
|                                              | Goat polyclonal anti-actin                      | sc-1616            | H0808          | IB, 1:200                                      |
|                                              | Rabbit polyclonal anti- $\beta$ 1-integrin      | sc-8978            | H2107          | IB, 1:300                                      |
|                                              | Rabbit polyclonal anti-FAK                      | sc-558             | D1204          | Co-IP, 1 $\mu$ g                               |
| Upstate/Millipore<br>(Temecula, CA)          | Mouse monoclonal anti-FAK                       | 05-537             | DAM1432863     | IF, 1:100                                      |
|                                              | Rabbit polyclonal anti-FAK                      | 06-543             | 31701          | IB, 1:1000<br>IHC, 1:100<br>Co-IP, 2 $\mu$ g   |
|                                              | Rabbit polyclonal anti-p-FAK-Tyr <sup>576</sup> | 07-157             | DAM1394797     | IB, 1:1000                                     |
| Abcam<br>(Cambridge, MA)                     | Rabbit monoclonal anti-p-Src-Tyr <sup>529</sup> | ab32078            | 391095         | IB, 1:7500                                     |
| Biosource/Invitrogen<br>(Carlsbad, CA)       | Rabbit monoclonal anti-p-FAK-Tyr <sup>397</sup> | 44-625G            | 319018A        | IB, 1:1000<br>IF, 1:50                         |
| Zymed/Invitrogen<br>(Carlsbad, CA)           | Rabbit polyclonal anti-occludin                 | 71-1500            | 366532A        | IB, 1:250<br>IF, 1:50<br>Co-IP, 2 or 3 $\mu$ g |
|                                              | Rabbit polyclonal anti-ZO-1                     | 61-7300            | 389452A        | IB, 1:300<br>IF, 1:50                          |
|                                              | Rabbit polyclonal anti-JAM-A                    | 36-1700            | 370923A        | IB, 1:300                                      |
|                                              | Rabbit polyclonal anti-claudin-11               | 36-4500            | 387613A        | IB, 1:250                                      |
| BD Biosciences<br>(San Jose, CA)             | Mouse monoclonal anti-EEA-1                     | 610456             | 76250          | IF, 1:50<br>IB, 1:2000                         |
|                                              | Mouse monoclonal anti-clathrin heavy chain      | 610499             | 76274          | IF, 1:100                                      |
| Cell Signaling<br>(Beverly, MA)              | Rabbit polyclonal anti-p38 MAPK                 | 9212               | 8              | IB, 1:1000                                     |
|                                              | Rabbit polyclonal anti-p-p38 MAPK               | 9211               | 16             | IB, 1:1000                                     |

<sup>a</sup> All antibodies used for IB and IF were diluted in BSA (0.1% and 1%, respectively) and for IHC, 10% normal goat serum.

<sup>b</sup>IB, immunoblotting; IF, immunofluorescent microscopy; IHC, immunohistochemistry; Co-IP, co-immunoprecipitation.
